# Supplementary material for: Laser Butt Welding of Thin Ti6Al4V Sheets: Effects of Welding Parameters
Source: MDPI journal article supplement (doi:10.3390/jcs5090246), 2021-09-13
Supplement: s1 [file s1]

Table S1

| Element    | Ti        | Al   | V   | Fe   | C    | N     | H     | O    | Others    |
|------------|-----------|------|-----|------|------|-------|-------|------|-----------|
| Weight (%) | Remainder | 6.10 | 4.0 | 0.15 | 0.03 | 0.018 | 0.002 | 0.13 | Each<0.10 |

Table S2

| Sample | Laser Power (kW) | Welding Speed (m/min) |
|--------|------------------|-----------------------|
| L11    | 2.6              | 2.6                   |
| L12    | 2.6              | 2.8                   |
| L13    | 2.6              | 3.0                   |
| L14    | 2.7              | 2.6                   |
| L15    | 2.7              | 2.8                   |
| L16    | 2.7              | 3.0                   |
| L17    | 2.8              | 2.6                   |
| L18    | 2.8              | 2.8                   |
| L19    | 2.8              | 3.0                   |
